# Supplementary material
Source: PubMed Central journal article supplement (PMC2528125)
Supplement: pp.108.119461_1.pdf [file pp.108.119461_1.pdf]

accaaaaaaaaactggatatcaagaatcaagatctactaatcctttcaaca  
**ATGGCAGAGAAAACCACCAGCACAAAGGTATGCAGTAGTGACTGGGGGAACAAAGGGATA**  
 M A E K T T S T R Y A V V T G G N K G I ◀ Motif I  
 GGATATGAAACATGCAGACAAGTCAAGCAAGGTAGTGGTTGTTGACATCAAGA  
G Y E T C R Q L A S K G V V V V L T S R  
 GATGAAAAGAAAGGCATTGAAGCTATTGAAAGGCTCAAGGAGGAGTCAAACCTCACTGAT  
 D E K K G I E A I E R L K E E S N F T D  
 GAACACATTTTGTTCATCAACTTGATATTATGGATCCAGCTAGTATTTCTTCTCTTGTC  
 E H I L F H Q L D I M D P A S I S S L V  
 AACCTCATCAAAACCAATTTGGAAGGCTCGATATTTGATTAACAACGCAGGAATTTCT  
 N L I K T K F G R L D I L I N N A G I S ◀ Motif II  
 GGAGTTATGGTAGAAGGAGATGTACAAGTACTAAAAGAGATACTAGAAAGATATATCTCA  
 G V M V E G D V Q V L K E I L E R Y I S  
 ATCGTTTTTACTGAAGATGAAAATGGAGAAGAGGGAGGTTGGACGAAATCAGGTCCTGGC  
 I V F T E D E N G E E G G W T K S G P G  
 AGTGTACAAATTATGAGTTGACAAAAGAATGCATAGAGACAAATTACTATGGTGCAAAA  
 S V T N Y E L T K E C I E T N Y Y G A K  
 AGGATGACTGAAGCATTATCCCTCCTTCAGCTCTCTAATTCACCAAGGATTGTTAAT  
 R M T E A F I P L L Q L S N S P R I V N  
 GTCGTTCTAGCATGGGAAAGTTAAAGCTATTGTGCAACAATGGGCAATAGAAGTGCTA  
 V A S S M G K L K L L C N K W A I E V L  
 CGTGATGCTGATAGCCTCACAGAAGAAAAGGTAGATCAGGTGGTGAATGAATTTCTCAAA  
 R D A D S L T E E K V D Q V V N E F L K  
 GATTTACAGAGAAATCAACAGAATCAAAGGATGGCCAAGTTACTTCACAGCCTACAAA  
 D F T E K S T E S K G W P S Y F T A Y K ◀ Motif III  
 GTCTCAAAAGCATCGTTGATTGCCTACACAAGGTTTTAGCTACCAAATATCCGAATTTT  
V S K A S L I A Y T R V L A T K Y P N F  
 CGAATAAACTCTGTATGTCCTGGCTATTGCAAAACAGACGTAATGCAATACTGGAAGC  
 R I N S V C P G Y C K T D V N A N T G S  
 TTAAGTGGTGGAGAAGGTGCTGAGAGCTTGGTGAATCTTGTCTTTCCTTCCAAACGATGGA  
 L T A G E G A E S L V N L A L L P N D G  
 CCTTCTGGCCTTTTCTTTTACAGAAAGGAGGTCACATTTTTTTGAgcattgtagatcca  
 P S G L F F Y R K E V T F F \*  
 caaaattggttttcggtatttggcagaattgaatcgttttctatcagttttatagacattg  
caagaaataaagatggatatatatttcttttaagtttaaaaaaaaaaaaaaaaaaaaaaaaa  
 aaaaaaa

**Supplemental Figure S1.** Nucleotide sequence and deduced amino acid sequence of the *CaMNR1* cDNA encoding the menthone: (+)-(3s)-neomenthol reductase protein. The deduced amino acid sequence is given below the nucleotide sequence. Translation start site is shown in bold type, termination codon is marked by an asterisk(\*) and polyadenylated sequences are double-underlined. The amino acid sequences of conserved domains of SDR are underlined. Binding domain (Motif I: GXXXGXG), the structural domain of undefined function (Motif II: (N/C)NAG), and the active site YXXXK element (Motif III) are shown by upper lines.
