# Supplementary material
Source: PubMed Central journal article supplement (PMC2528125)
Supplement: pp.108.119461_2.pdf [file pp.108.119461_2.pdf]

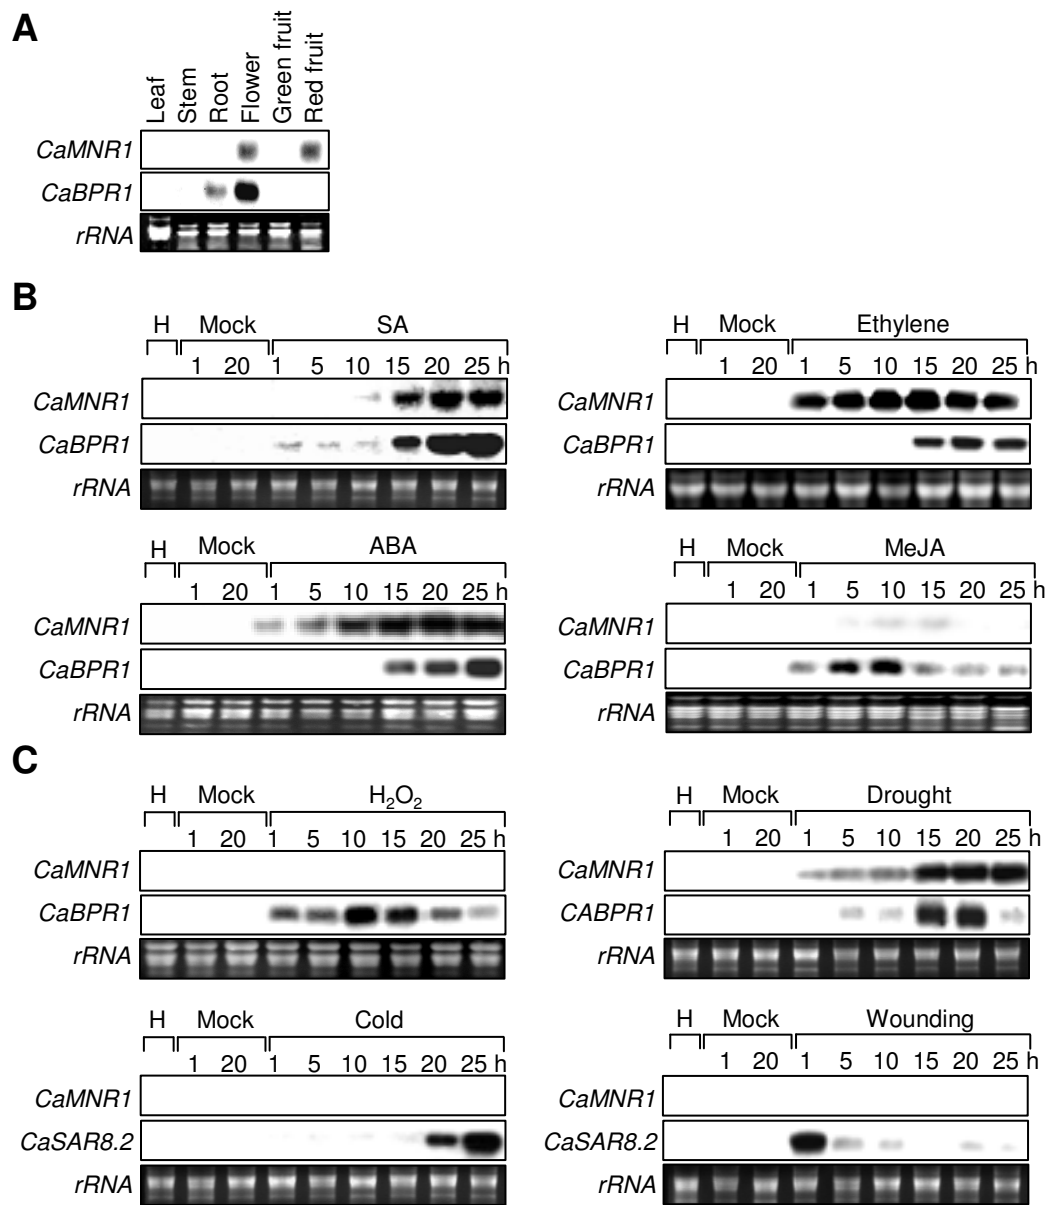

**Supplemental Figure S2.** RNA gel blot analysis of expression of the *CaMNR1* in pepper plants. RNA gel blot analysis of expression of the *CaMNR1*, *CaBPR1* (basic PR1) and *CaSAR8.2* genes in pepper plants. Membranes were hybridized with [<sup>32</sup>P]dCTP labeled gene-specific *CaMNR1*, *CaBPR1* (basic PR1) and *CaSAR8.2* probes. Equal loading of total RNA (20 µg per lane) was verified by visualizing rRNA on a gel stained with ethidium bromide. A, Organ-specific expression of the *CaMNR1* and *CaBPR1* (basic PR1) genes in pepper plants. B, Expression of the *CaMNR1* and *CaBPR1* (basic PR1) genes in pepper leaves at various time points after treatment with 5 mM salicylic acid (SA), 100 µl L<sup>-1</sup> ethylene, 100 µM abscisic acid (ABA) and 100 µM methyl jasmonate (MeJA) at the six-leaf stage. C, Expression of the *CaMNR1*, *CaBPR1* (basic PR1) and *CaSAR8.2* genes in pepper leaves at various time points after treatment with 100 µM H<sub>2</sub>O<sub>2</sub>, drought, cold or mechanical wounding at the six-leaf stage.
