# Supplementary material
Source: PubMed Central journal article supplement (PMC2528125)
Supplement: pp.108.119461_3.pdf [file pp.108.119461_3.pdf]

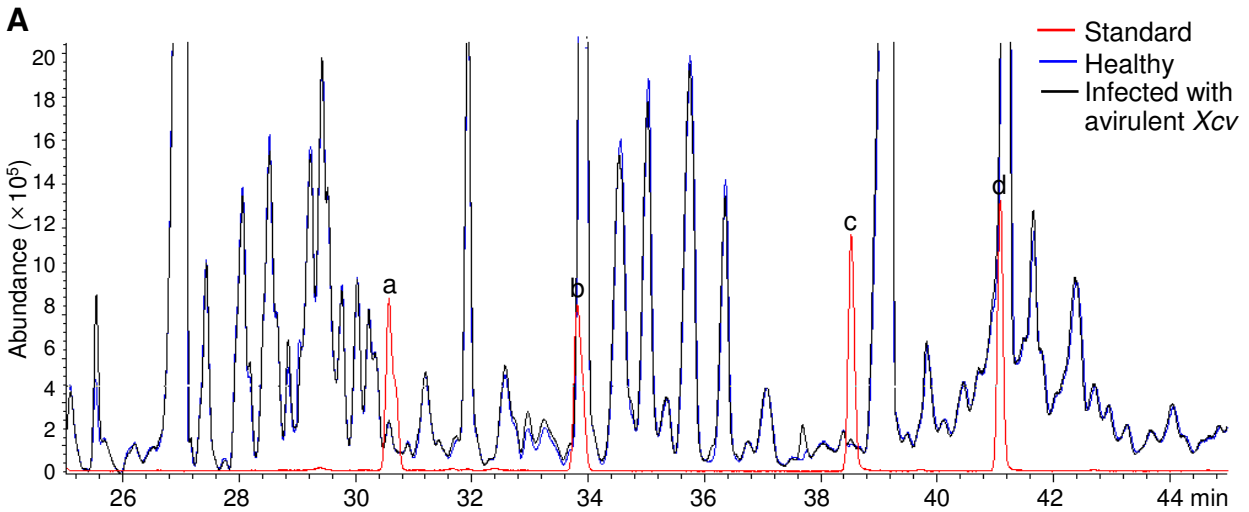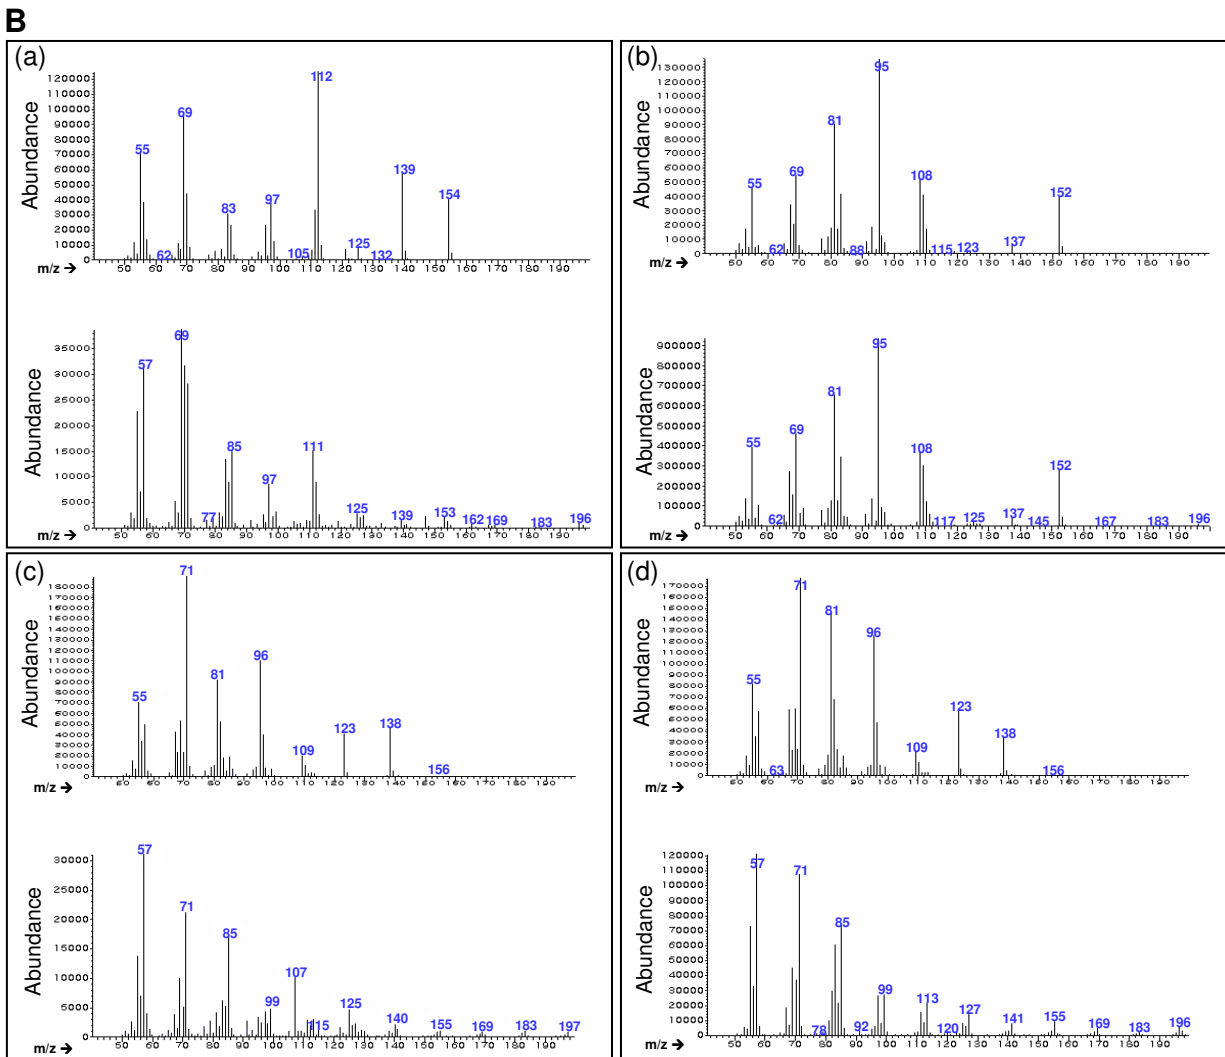

**Supplemental Figure S3.** Comparison of GC-MS total ion chromatograms (TICs) of pepper leaf extracts with those of standard mixtures. A, Comparison of GC-MS total ion chromatograms (TICs) of extracts from healthy pepper leaves and leaves infected with avirulent strain Bv5-4a of *Xanthomonas campestris* pv. *vesicatoria* (Xcv), and of standard mixtures. a: (-)-menthone, b: camphor (internal standard), c: (+)-(3S)-neomenthol, and d: (-)-(3R)-menthol. B, Comparison of mass spectra of (a) (-)-menthone, (b) camphor (internal standard), (c) (+)-(3S)-neomenthol and (d) (-)-(3R)-menthol (upper) with metabolic compounds in leaf extracts at identical retention times (lower).
