# Supplementary material
Source: PubMed Central journal article supplement (PMC2528125)
Supplement: pp.108.119461_4.pdf [file pp.108.119461_4.pdf]

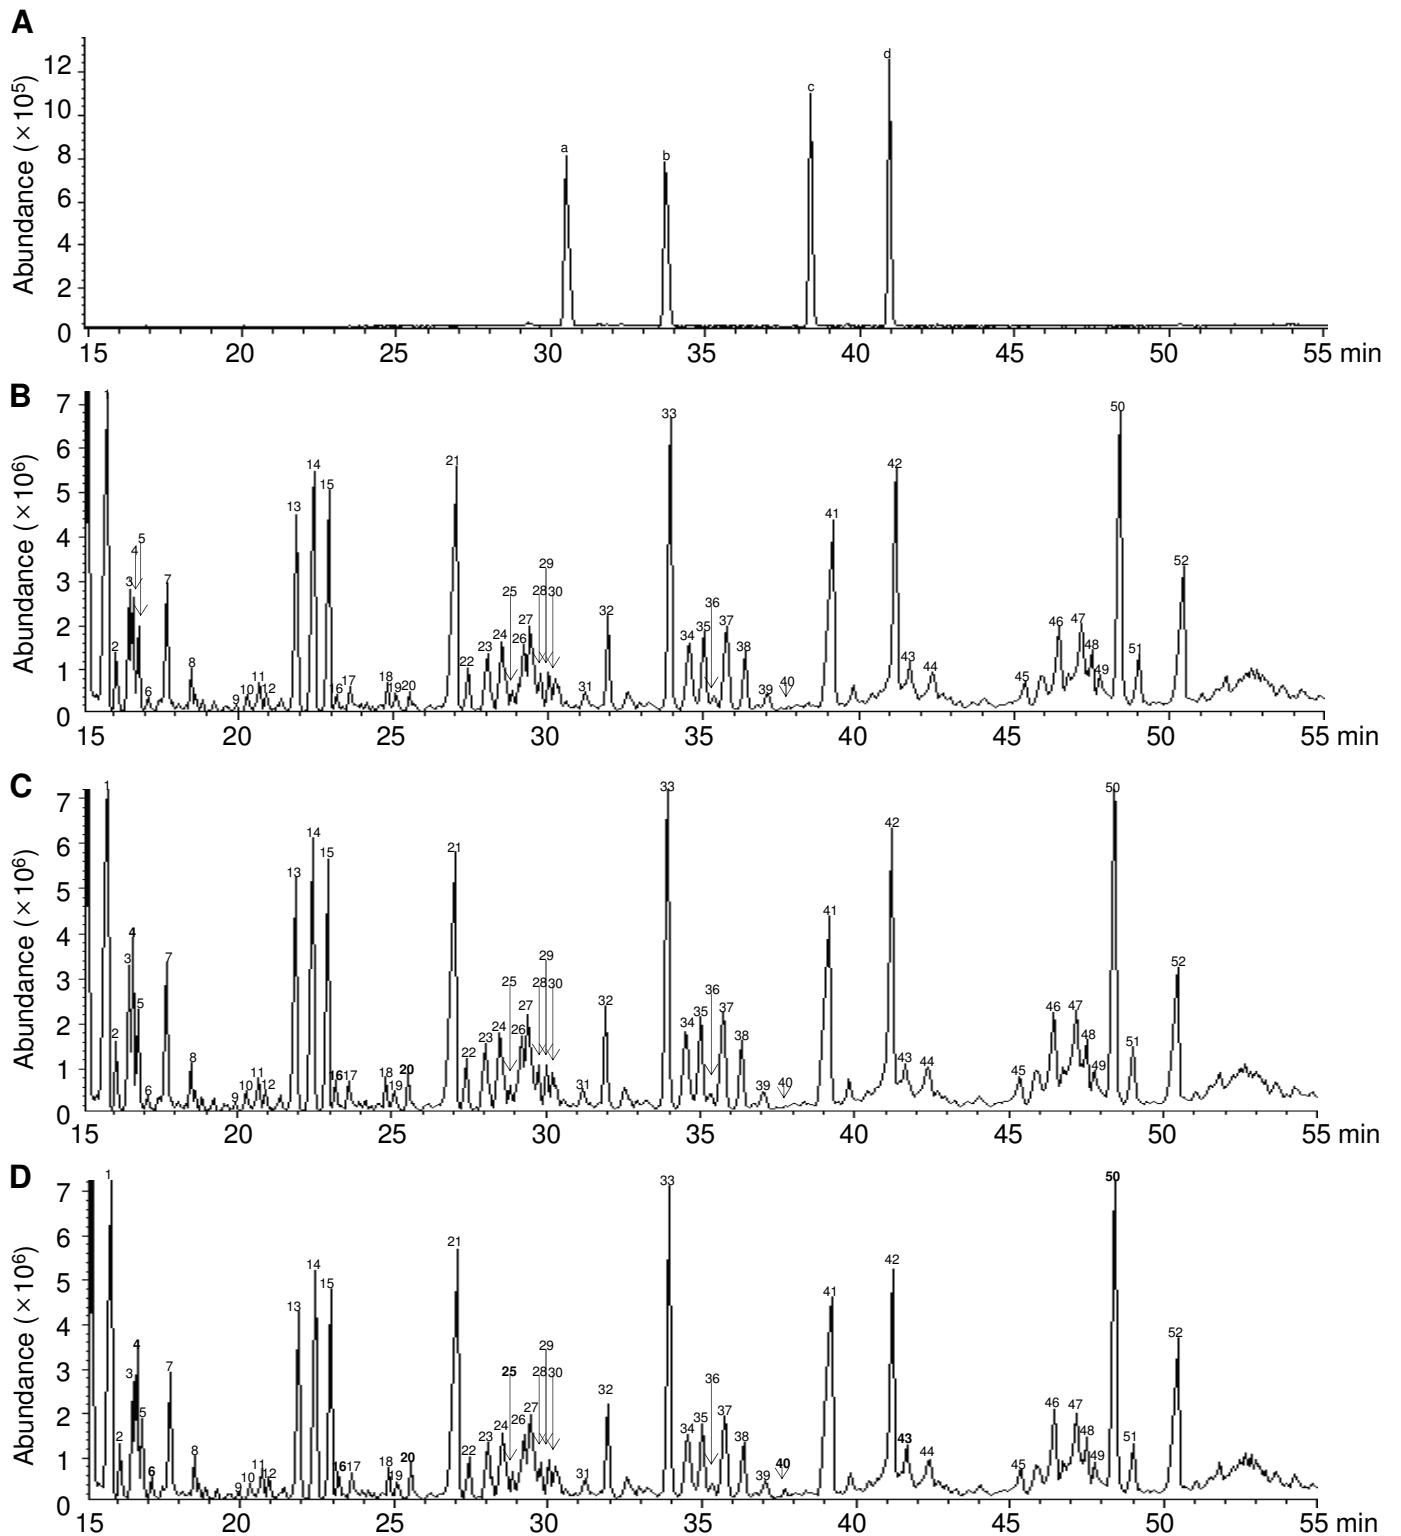

**Supplemental Figure S4.** GC-MS total ion chromatograms (TICs) of extracts from pepper leaves infected with virulent (D<sub>s1</sub>) or avirulent (Bv5-4a) *Xanthomonas campestris* pv. *vesicatoria* (Xcv). A, GC-MS TICs of standard mixtures. a: (-)-menthone, b: camphor (internal standard), c: (+)-(3S)-neomenthol, and d: (-)-(3R)-menthol. B, GC-MS TICs of extracts from uninoculated healthy pepper leaves. C, GC-MS TICs of extracts from pepper leaves infected with virulent strain D<sub>s1</sub> of Xcv. D, GC-MS TICs of extracts from pepper leaves infected with avirulent strain Bv5-4a of Xcv.
